# Supplementary material for: Broadband model-based optoacoustic microscopy enables deep-tissue imaging beyond the acoustic diffraction limit
Source: Research Square preprint supplement (doi:10.21203/rs.3.rs-496385/v1), 2021-05-27
Supplement: Supplementary file 1 [file da400fe010a81162b56d8199.docx]

**Supplementary figures**


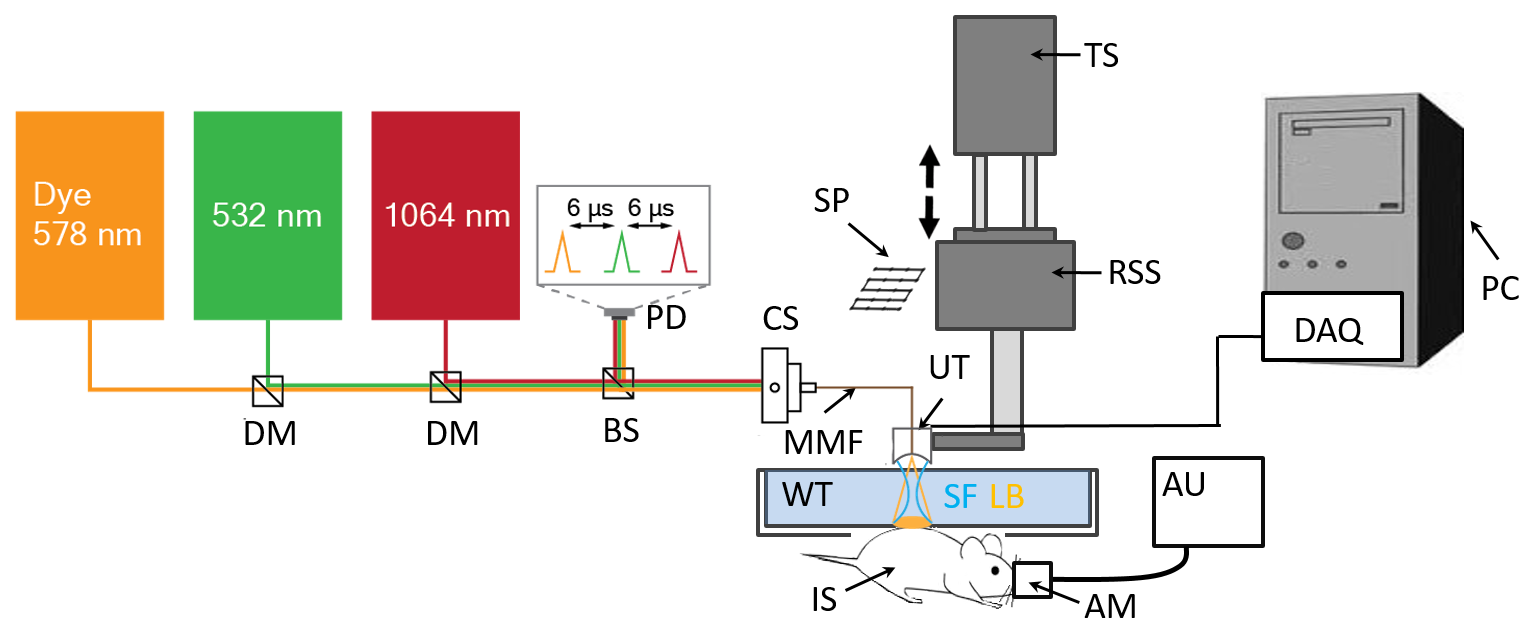


**Suppl. Fig. 1. AR-OAM system**. Lay-out of the experiment system. DM – dichroic mirror, BS – beam splitter, PD – photodiode, CS – coupling stage, MMF – multi-mode fiber, TS – translation stage, RSS - raster-scanning stages, SP – scanning pattern, UT – ultrasound transducer, WT – water tank, SF – sensitivity field, LB – light beam, IS – imaging sample, AU – anesthesia unit, AM – anesthesia mask, DAQ – data acquisition system, PC – personal computer.


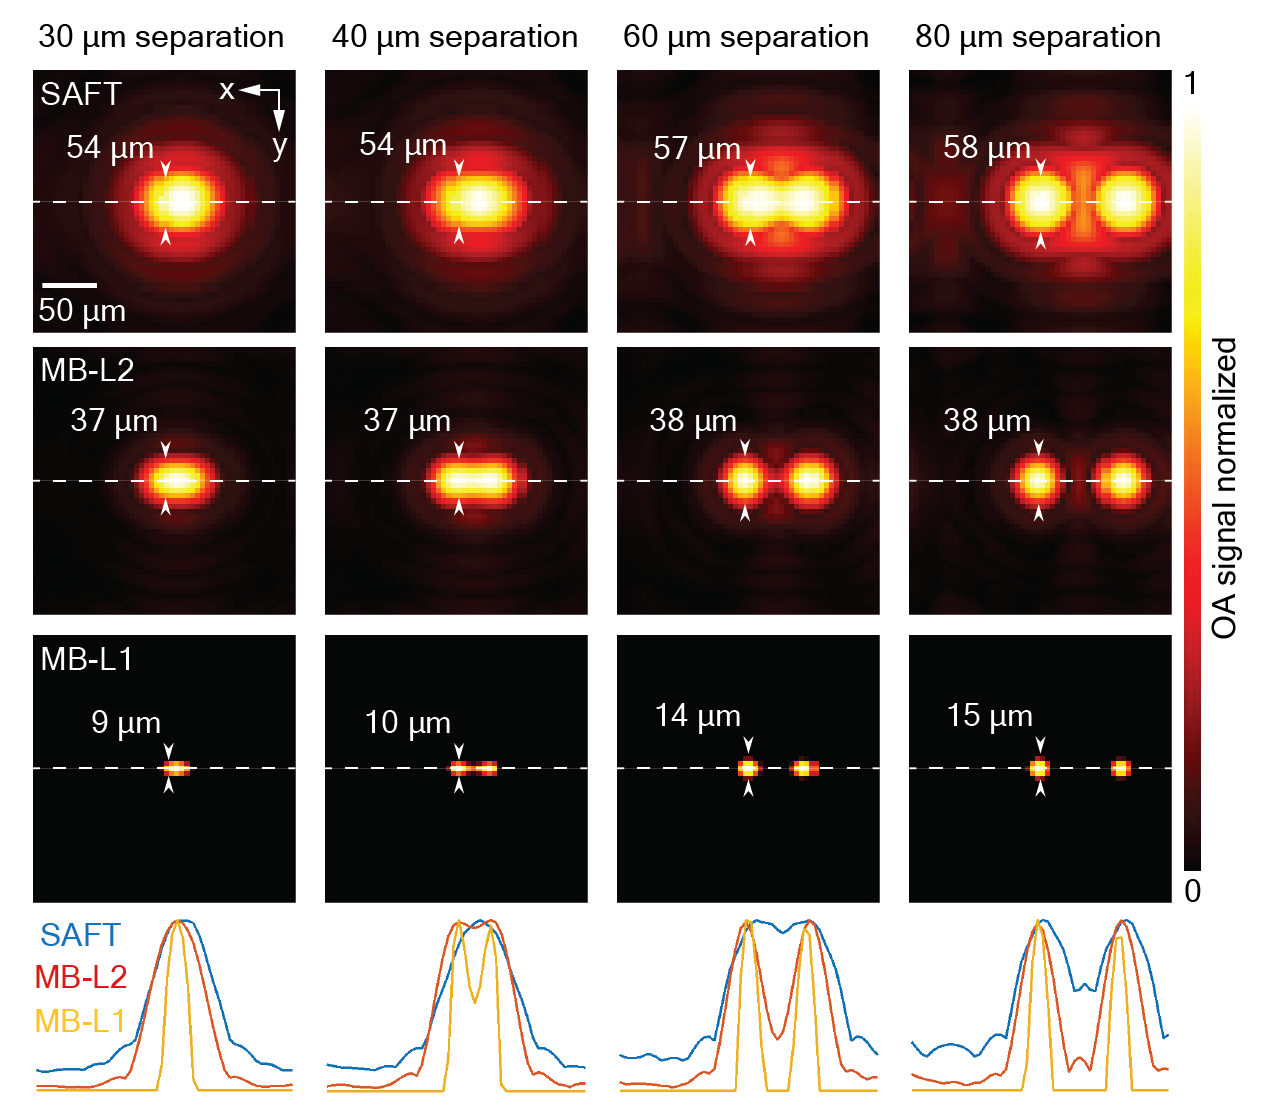


**Suppl. Fig. 2. Super-resolution imaging with MB-L1**. Maximum intensity projections (MIPs) along the depth direction of the AR-OAM images reconstructed with the SAFT (top), MB-L2 (middle) and MB-L1 (bottom) methods from simulated data corresponding to two 20 m absorbers with separations ranging from 30 to 80 m. Full width at half maxima (FWHM) and central image profiles are shown.


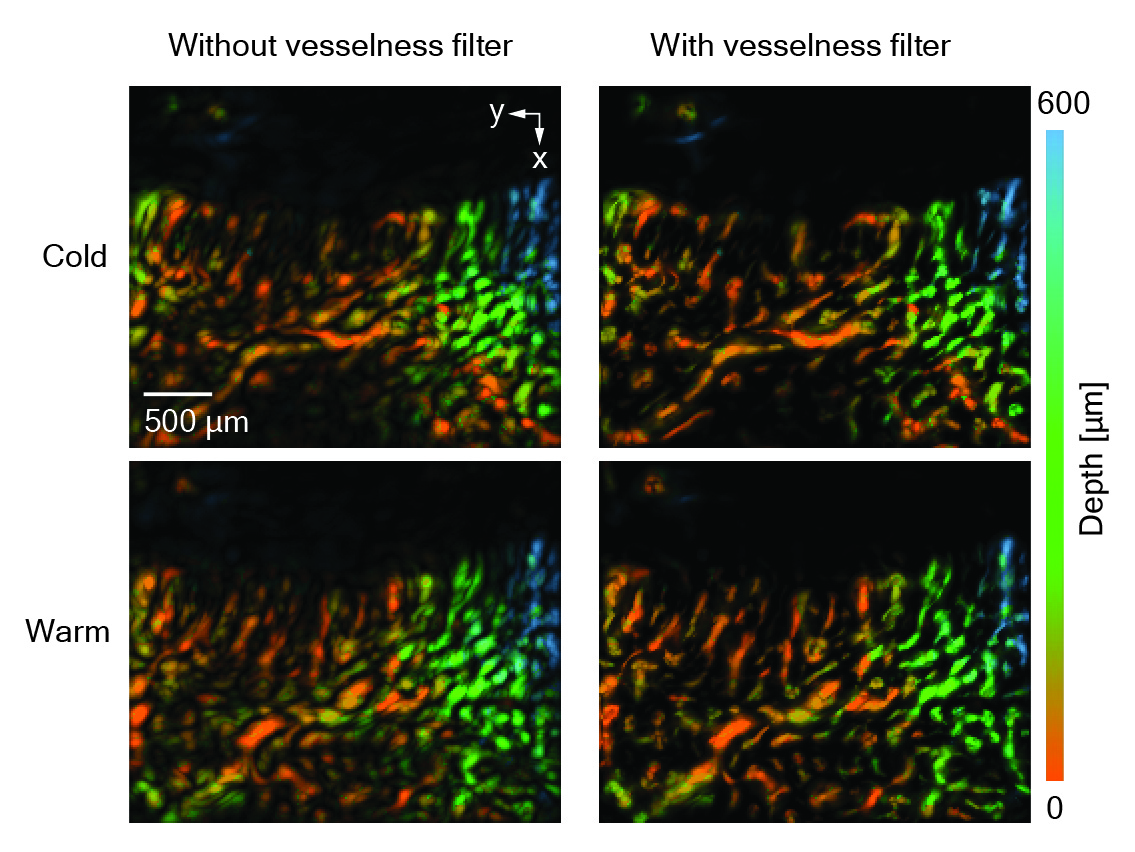


**Suppl. Fig. 3. Frangi vesselness filtering**. Left - Maximum intensity projections (MIPs) along the depth direction of nailfold images reconstructed with MB-L2. Right – Equivalent images after application of a Frangi vesselness filter. Images obtained immediately after immersion in cold and warm water, respectively, are shown. All images are color-coded for depth.


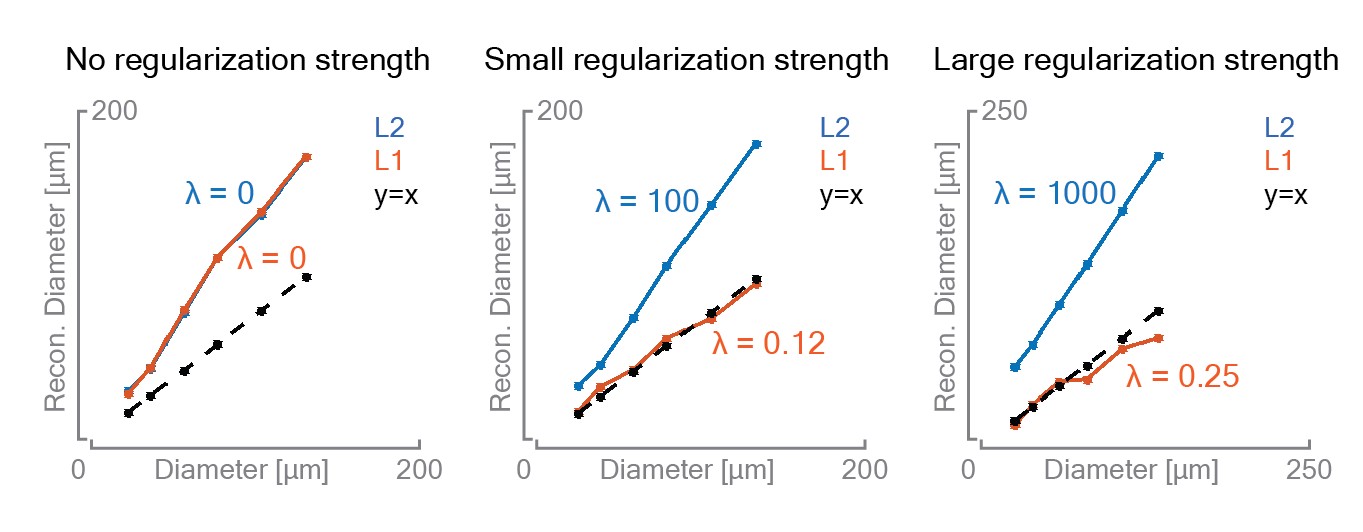


**Suppl. Fig. 4. Effects on regularization on reconstructed dimensions**. Reconstructed diameter of a simulated sphere as a function of the actual diameter for the MB-L1 and MB-L2 and methods. A comparison is shown for different regularization intensities. Regularization parameters are indicated.
